# Supplementary material for: The concentrations of selective endocrine disruptors in milk from different lactation periods of cows
Source: Research Square preprint supplement (doi:10.21203/rs.3.rs-3314549/v1), 2023-09-05
Supplement: Supplementary file 1 [file cc759a3d54483147997ffe81.docx]

**The concentrations of selective endocrine disruptors in milk from different lactation periods of cows**

Ilker SIMSEK1, Ozgur KUZUKIRAN1, Ummu Gulsum BOZTEPE2,

Meryem TOPRAK2, Mouhyadin Abdourahman HARBI3, Reza Ebrahimi HARIRY2, Begum YURDAKOK-DIKMEN4, Ufuk Tansel SIRELI5, Ayhan FILAZI4*

*1Eldivan Vocational School of Health Services, Cankiri Karatekin University, Eldivan, Cankiri, Turkey.*

*2**Department of Pharmacology and Toxicology, Institute of Health Sciences, Ankara University, Turkey.*

*3Department of Biology, Graduate School of Natural and Applied Sciences, Cankiri Karatekin University, Cankiri, Turkey*

*4Department of Pharmacology and Toxicology, Faculty of Veterinary Medicine, Ankara University, Turkey.*

*5Department of Food Hygiene and Technologies, Faculty of Veterinary Medicine, Ankara University, Turkey*

**Corresponding Author; E-mail:* [*filazi@veterinary.ankara.edu.tr*](mailto:filazi@veterinary.ankara.edu.tr)*, Orcid: 0000-0002-2800-6215).*

**Supplementary Table 1.** Gas Chromatography oven program used for targeted endocrine disrupting compounds

| **Procedure** | **For Organochlorine pesticides, Polychlorinated biphenyls and Polybrominated diphenyl ethers** | | | **For Policyclic aromatic hydrocarbons** | | |
| --- | --- | --- | --- | --- | --- | --- |
| Rate (°C/min) | Temperature  (°C) | Hold time (min) | Rate (°C/min) | Temperature  (°C) | Hold time (min) |
| Furnace Programme |  | 70 | 2 |  | 70 | 2 |
| 25 | 150 | 0 | 25 | 150 | 0 |
| 5 | 200 | 5 | 5 | 200 | 5 |
| 5 | 270 | 2 | 5 | 270 | 2 |
| 25 | 290 | 5 | 5 | 290 | 5 |
| Total time | | 44 | Total time | | 45.2 |

**Supplementary Table 2.** Polycyclic aromatic hydrocarbons and their toxic equivalency factors.

| **PAHs** | **Abbreviation** | **Carsinogenic classification (IARC)a** | **TEFb** |
| --- | --- | --- | --- |
| Naphthalene | NaP | 2B | 0.001 |
| Acenaphthylene | Acy | n/a | 0.001 |
| Acenaphtene | Ace | 3 | 0.001 |
| Fluorene | Flu | 3 | 0.001 |
| Phenanthrene | Phen | 3 | 0.001 |
| Anthracene | Anth | 3 | 0.01 |
| Fluoranthene | Fla | 3 | 0.001 |
| Pyrene | Pyr | 3 | 0.001 |
| Benzo(a)anthracene | BaA | 2B | 0.1 |
| Chrysene | Chr | 2B | 0.01 |
| Benzo(b)fluoranthene | BbF | 2B | 0.1 |
| Benzo(k)fluoranthene | BkF | 2B | 0.1 |
| Benzo(a)pyrene | BaP | 1 | 1.0 |
| Indeno(1,2,3,c,d)pyrene | Ind | 2B | 0.1 |
| Dibenz(a,h)anthracene | DbA | 2A | 1.0 |
| Benzo(g,h,i)perylene | BghiP | 3 | 0.01 |

na=not applicable

aAccording to IARC (2022) evaluation: group 1, Carcinogenic to humans group; 2A, probable human carcinogenic to humans; group 2B, possible carcinogenic to humans; group 3, unclassifiable as to carcinogenicity to humans.

bBaP carcinogenic equivalency factors described by Nisbet and LaGoy (1992).

**Supplementary Table 3.** Validation data of targeted organochlorine pesticides, polychlorinated biphenyls and polybrominated biphenyl ethers in cow milk

| **Compound** | **Linearity**  **(µg/kg)** | **Correlation coefficient (r2)** | **LOD**  **(µg/kg)** | **LOQ**  **(µg/kg)** | **Mean Recovery (%)** | **Repeatability (RSD%)** | **Intermediate precision (RSD%)** |
| --- | --- | --- | --- | --- | --- | --- | --- |
| *Organochlorine pesticides (OCP)* | | | | | | | |
| α- HCH | 1-100 | 0.990 | 0.73 | 2.2 | 93.2±10.1 | 3.0 | 8.1 |
| β- HCH | 1-100 | 0.995 | 0.63 | 1.89 | 101.3±11.4 | 9.4 | 6.3 |
| Lindane | 1-100 | 0.991 | 0.68 | 2.05 | 105.4±9.5 | 7.7 | 9.7 |
| HCB | 1-100 | 0.997 | 0.51 | 1.54 | 95.6±7.8 | 2.3 | 8.6 |
| HEP | 1-100 | 0.995 | 0.45 | 1.36 | 96,4±9.4 | 10.1 | 7.3 |
| α-Endosulfan | 1-100 | 0.997 | 0.51 | 1.53 | 89.8±9.9 | 10.8 | 5.1 |
| Aldrin | 1-100 | 0.995 | 0.77 | 2.3 | 92.4±11.2 | 7.6 | 10.4 |
| Dieldrin | 1-100 | 0.995 | 0.76 | 2.28 | 88.7±10.1 | 11.0 | 9.9 |
| *p,p′-*DDD | 1-100 | 0.995 | 0.43 | 1.29 | 106.8±5.7 | 8.3 | 9.3 |
| *p,p′-*DDE | 1-100 | 0.998 | 0.31 | 0.94 | 97.9±6.5 | 2.1 | 6.8 |
| *o,p’*- DDT | 1-100 | 0.995 | 0.43 | 1.29 | 93.6±6.5 | 6.7 | 8.4 |
| *p,p′-*DDT | 1-100 | 0.999 | 0.27 | 0.82 | 95.4±9.2 | 7.2 | 6.8 |
| Methoxychlor | 1-100 | 0.998 | 0.54 | 1.62 | 97.4±8.4 | 9.9 | 7.3 |
| *Polychlorinated Biphenyls (PCBs)* | | | | | | | |
| PCB28 | 1-100 | 0.993 | 0.44 | 1.33 | 93.6±6.5 | 8.6 | 2.2 |
| PCB52 | 1-100 | 0.992 | 0.43 | 1.28 | 95.4±9.2 | 7.3 | 10.3 |
| PCB101 | 1-100 | 0.994 | 0.48 | 1.45 | 95.6±7.7 | 5.1 | 9.7 |
| PCB118 | 1-100 | 0.993 | 0.49 | 1.47 | 93.9±7.1 | 4.9 | 4.8 |
| PCB153 | 1-100 | 0.997 | 0.34 | 1.01 | 90.8±8.2 | 2.2 | 13.2 |
| PCB138 | 1-100 | 0.995 | 0.36 | 1.07 | 95.0±5.9 | 10.1 | 3.6 |
| PCB180 | 1-100 | 0.991 | 0.66 | 1.98 | 96.9±9.3 | 6.8 | 5.3 |
| *Polybrominated Diphenyl Ethers (PBDEs)* | | | | | | | |
| PBDE 28 | 1-100 | 0,993 | 0.12 | 0,37 | 93.3±3.8 | 4.9 | 8.1 |
| PBDE 47 | 1-100 | 0,997 | 0,18 | 0,53 | 93.8±5.8 | 5.5 | 6.3 |
| PBDE 66 | 1-100 | 0,994 | 0,20 | 0,61 | 96.2±6.9 | 7.3 | 9.7 |
| PBDE 99 | 1-100 | 0,995 | 0,20 | 0,59 | 91.2±7.2 | 6.2 | 8.6 |
| PBDE 85 | 1-100 | 0,993 | 0,16 | 0,47 | 92.5±3.9 | 4.8 | 7.3 |
| PBDE 100 | 1-100 | 0,994 | 0.16 | 0,49 | 90.1±8.4 | 3.6 | 5.1 |
| PBDE 153 | 1-100 | 0,991 | 0,17 | 0,52 | 92.5±3.9 | 5.3 | 4.9 |
| PBDE 154 | 1-100 | 0,992 | 0,30 | 0,89 | 91.1±1.7 | 2.2 | 2.2 |
| PBDE 183 | 1-100 | 0,990 | 0,31 | 0,92 | 86.5±8.3 | 10.1 | 10.1 |

**Supplementary Table 4.** Validation data of targeted polycyclic aromatic hydrocarbons in cow milk

| **Compound** | **Linearity**  **(µg/kg)** | **Correlation coefficient (r2)** | **LOD**  **(µg/kg)** | **LOQ**  **(µg/kg)** | **Mean Recovery (%)** | **Repeatability (RSD%)** | **Intermediate precision (RSD%)** |
| --- | --- | --- | --- | --- | --- | --- | --- |
| Naphthalene | 1-100 | 0,988 | 0,21 | 0,63 | 88.7±10.1 | 3.0 | 9.4 |
| Acenaphthylene | 1-100 | 0,992 | 0,17 | 0,51 | 106.8±5.7 | 9.4 | 10.5 |
| Acenaphtene | 1-100 | 0,991 | 0,19 | 0,57 | 97.9±6.5 | 7.7 | 12.3 |
| Fluorene | 1-100 | 0,995 | 0,14 | 0,42 | 90.9±8.2 | 2.3 | 3.7 |
| Phenanthrene | 1-100 | 0,995 | 0,19 | 0,57 | 95.0±5.9 | 10.1 | 5.8 |
| Anthracene | 1-100 | 0,994 | 0,17 | 0,51 | 95.1±6.9 | 10.8 | 5.8 |
| Fluoranthene | 1-100 | 0,996 | 0,18 | 0,54 | 91.2±7.2 | 7.6 | 10.1 |
| Pyrene | 1-100 | 0,996 | 0,15 | 0,45 | 92.3±6.4 | 11.0 | 12.9 |
| Benzo(a)anthracene | 1-100 | 0,994 | 0,11 | 0,33 | 97.0±6.3 | 8.3 | 7.6 |
| Chrysene | 1-100 | 0,993 | 0,12 | 0,36 | 93.0±6.7 | 2.1 | 3.2 |
| Benzo(b)fluoranthene | 1-100 | 0,996 | 0,15 | 0,45 | 90.5±7.2 | 6.7 | 4.8 |
| Benzo(k)fluoranthene | 1-100 | 0,997 | 0,15 | 0,45 | 95.1±6.9 | 7.2 | 4.8 |
| Benzo(a)pyrene | 1-100 | 0,997 | 0,12 | 0,36 | 91.2±7.2 | 9.9 | 3.6 |
| Indeno(1,2,3,c,d)pyrene | 1-100 | 0,994 | 0,15 | 0,45 | 95.1±6.9 | 2.3 | 5.3 |
| Dibenz(a,h)anthracene | 1-100 | 0,992 | 0,13 | 0,39 | 91.2±7.2 | 4.9 | 2.2 |
| Benzo(g,h,i)perylene | 1-100 | 0,994 | 0,17 | 0,51 | 92.3±6.4 | 4.9 | 8.1 |
